# Supplementary material
Source: publisher site journal article supplement (https://neobiota.pensoft.net/article/28914/download/suppl/31/)

**Supplementary Tables and Figures**

**Table S1. Taxa categorized by results of single classification G-tests and replicated tests for goodness of fit after p-value correction.** Decreaser taxa significantly decreased in frequency of occurrence from 1982 to 2010/2011, increaser taxa significantly increased, and no-change taxa were not significant. The number of ponds (of 22) a taxa was significantly increasing or decreasing in before (outside of parentheses) and after (inside parentheses) p-value correction. Asterisks indicate exotic or hybrid taxa. Species were classified as emergent (E) or submersed/floating (S/F) based on where the majority of the foliage is typically found. Calculated pooled G scores (Gpool) and total G scores (G tot) are presented; df for Gpool was always 1.

| **Decreaser taxa** | **Habit** | **Ponds 1982** | **Ponds 2010** | **# Ponds Increasing** | **# Ponds Decreasing** | **%Frequency Change** | **Gpool** | **Gtot** | **df het** |
| --- | --- | --- | --- | --- | --- | --- | --- | --- | --- |
| *Ranunculus flabellaris* | S/F | 7 | 1 | 0 | 5 (3) | -99 | 65.17 | 68.94 | 7 |
| *Eleocharis* sp. | E | 14 | 5 | 1 (0) | 8 (7) | -91 | 92.87 | 153.14 | 17 |
| *Iris virginica* | E | 4 | 3 | 0 | 2 (0) | -83 | 9.99 | 20.63 | 6 |
| *Juncus* sp. | E | 7 | 8 | 0 | 3 (3) | -82 | 31.47 | 64.45 | 11 |
| *Calamagrostis canadensis* | E | 8 | 11 | 1 (0) | 6 (4) | -79 | 30.87 | 93.21 | 17 |
| *Stuckenia pectinata* | S/F | 5 | 3 | 0 | 3 (3) | -74 | 18.52 | 34.42 | 6 |
| *Dulichium arundinaceum* | E | 5 | 5 | 0 | 3 (1) | -72 | 9.49 | 42.09 | 10 |
| *Proserpinaca palustris* | S/F | 11 | 8 | 0 | 8 (5) | -68 | 30.04 | 94.66 | 15 |
| *Persicaria amphibium* | E | 15 | 16 | 0 | 6 (3) | -64 | 40.62 | 82.77 | 18 |
| *Sagittaria latifolia* | E | 8 | 10 | 2 (0) | 2 (2) | -64 | 18.27 | 64.91 | 11 |
| *Nuphar* sp. | S/F | 13 | 13 | 1 (0) | 3 (0) | -61 | 23.21 | 57.29 | 14 |
| *Schoenoplectus acutus* | E | 14 | 18 | 1 (0) | 6 (3) | -60 | 22.92 | 97.44 | 20 |
| *Chara* sp. | S/F | 13 | 9 | 0 | 6 (4) | -59 | 55.97 | 122.40 | 14 |
| *Najas flexilis* | S/F | 11 | 11 | 1 (0) | 3 (1) | -41 | 10.85 | 76.80 | 14 |
| *Myriophyllum verticillatum* | S/F | 13 | 14 | 2 (1) | 4 (2) | -30 | 10.68 | 119.08 | 15 |
| **Increaser taxa** |  |  |  |  |  |  |  |  |  |
| *Utricularia macrorhiza* | S/F | 18 | 18 | 6 (5) | 4 (3) | 52 | 22.36 | 228.96 | 20 |
| *Typha* x *glauca** | E | 13 | 15 | 4 (1) | 1 (1) | 65 | 39.04 | 208.28 | 22 |
| *Nymphaea odorata* | S/F | 7 | 13 | 4 (2) | 1 (0) | 66 | 9.98 | 66.55 | 13 |
| *Potamogeton* narrow-leafed | S/F | 9 | 16 | 6 (4) | 2 (2) | 106 | 15.05 | 94.73 | 18 |
| *Persicaria hydropiperoides* | E | 4 | 10 | 3 (2) | 1 (1) | 131 | 9.05 | 60.36 | 11 |
| *Zizania palustris* | E | 4 | 12 | 4 (1) | 0 | 151 | 11.28 | 32.97 | 12 |
| *Carex* sp. | E | 3 | 15 | 0 | 0 | 199 | 9.47 | 39.62 | 16 |
| *Cephalanthus occidentalis* | E | 4 | 7 | 2 (0) | 0 | 258 | 18.50 | 20.05 | 7 |
| *Phragmites australis** | E | 2 | 16 | 8 (7) | 0 | 2081 | 81.46 | 109.36 | 18 |
| *Lythrum salicaria** | E | 0 | 19 | 9 (4) | N/A | Colonization | 87.58 | 87.58 | 19 |
| **No change taxa** |  |  |  |  |  |  |  |  |  |
| *Nitella* sp. | S/F | 7 | 4 | 1 (0) | 0 | -59 | 4.12 | 23.24 | 10 |
| *Alisma subcordatum* | E | 2 | 6 | 0 | 0 | -57 | 2.15 | 11.27 | 6 |
| *Scirpus* sp. | E | 8 | 3 | 1 (0) | 3 (0) | -53 | 4.57 | 23.17 | 8 |
| *Poaceae* sp. | E | 3 | 10 | 0 | 1 (0) | -40 | 2.06 | 29.30 | 11 |
| *Pontederia cordata* | E | 3 | 5 | 1 (0) | 1 (0) | -10 | 0.03 | 17.14 | 7 |
| *Sparganium emersum* | E | 14 | 16 | 2 (1) | 2 (1) | -8 | 0.23 | 56.91 | 18 |
| *Utricularia gibba* | S/F | 6 | 6 | 2 (1) | 1 (1) | -6 | 0.09 | 53.30 | 8 |
| *Potamogeton* wide-leafed | S/F | 16 | 17 | 5 (1) | 2 (1) | 0 | 0.00 | 72.99 | 20 |
| *Thelypteris palustris* | E | 5 | 9 | 1 (0) | 1 (0) | 20 | 0.16 | 17.68 | 12 |
| *Lycopus* sp. | E | 1 | 7 | 0 | 0 | 65 | 0.67 | 16.11 | 8 |
| *Lemna minor* | S/F | 1 | 10 | 1 (0) | 1 (0) | 124 | 2.54 | 16.15 | 10 |
| *Potamogeton robbinsii* | S/F | 1 | 1 | 0 | 0 | 200 | 2.64 | 2.64 | 1 |
| *Scutellaria* sp. | E | 1 | 4 | 0 | 0 | 380 | 3.53 | 4.08 | 4 |

**Table S2. Mean (standard error) percent area covered across ponds of each of the five invader species in the 2010/2011 sampling period.** Asterisks indicate significant differences between young and old ponds as evaluted by Wilcoxon tests.

|  | **All ponds**  **(N=22)** | **Young ponds only**  **(N=10)** | **Old ponds**  **(N=12)** |
| --- | --- | --- | --- |
| *Persicaria hydropiperoides* | 0.48 (0.45) | 0.03 (0.02) | 0.86 (0.82) |
| *Cephalanthus occidentalus* | 2.54 (1.34) | 0.02 (0.006) | 4.64 (2.32)* |
| *Typha* x *glauca* | 7.91 (2.23) | 1.45 (0.99) | 13.30 (3.3)* |
| *Phragmites australis* | 11.48 (4.53) | 18.48 (8.72) | 5.65 (3.64)* |
| *Lythrum salicaria* | 0.70 (0.26) | 0.67 (0.49) | 0.72 (0.25) |

**Table S3. Results of ANOVAs predicting proportional change in pond-scale richness or Pileou’s evenness from 1982 to 2010/2011 from pond age group and invader coverage in the resample period.** Pond was included as a random effect. Invader variables are arcsin(sqrt)-transformed pond-level proportion cover values from the modern (2010/2011) time period. Each model included one target invader, with the other four invaders included as a second predictive variable (“Others”). Interactions factors were included in the original model, and removed if they were not significant (p>0.05).

| **Richness change** | | | | **Evenness change** | | | |
| --- | --- | --- | --- | --- | --- | --- | --- |
| **Adj R2** | **Source** | **F Ratio** | **P** | **Adj R2** | **Source** | **F Ratio** | **P** |
| 0.653 | Age | 14.47 | 0.0014* | 0.085 | Age | 2.26 | 0.015* |
|  | *Phragmites* | 6.62 | 0.0197* |  | *Phragmites* | 2.07 | 0.168 |
|  | Others | 0.04 | 0.849 |  | Others | 0.06 | 0.899 |
|  | Age**Phragmites* | 4.52 | 0.0485* |  |  |  |  |
| 0.609 | Age | 10.69 | 0.0043* | 0.277 | Age | 5.40 | 0.034* |
|  | *Typha* | 0.38 | 0.541 |  | *Typha* | 1.52 | 0.236 |
|  | Others | 17.44 | 0.0006* |  | Others | 0.47 | 0.500 |
|  |  |  |  |  | Age**Typha* | 4.87 | 0.042* |
| 0.663 | Age | 11.36 | 0.0034* | 0.238 | Age | 2.23 | 0.153 |
|  | *Lythrum* | 0.587 | 0.453 |  | *Lythrum* | 2.71 | 0.117 |
|  | Others | 22.81 | 0.0002* |  | Others | 5.12 | 0.036* |
| 0.659 | Age | 15.91 | 0.0009* | 0.192 | Age | 3.46 | 0.079 |
|  | *Persicaria* | 0.80 | 0.382 |  | *Persicaria* | 1.15 | 0.297 |
|  | Others | 22.36 | 0.0002* |  | Others | 2.21 | 0.154 |
| 0.648 | Age | 11.09 | 0.0037* | 0.145 | Age | 2.45 | 0.135 |
| *Cephalanthus* | 0.00 | 0.971 | *Cephalanthus* | 0.36 | 0.554 |
| Others | 21.37 | 0.0002* | Others | 3.23 | 0.089 |

**Table S4. Characteristics of 0.5 m2 quadrats placed in patches of species or nearby reference areas.**

| **Patch Type** | **Light availability** | **Water Depth (cm)** | **Percent Cover of Patch Species** | **Max height of Patch species (cm)** |
| --- | --- | --- | --- | --- |
| Reference | 89.1 (2.77) a | 50.0 (1.76) a | N/A | N/A |
| *Cephalanthus occidentalis* | 11.2 (1.23) c | 45.0 (1.18) a | 77.6 (2.50) | 152 (6.34) a |
| *Schoenoplectus acutus* | 27.7 (2.20) b | 26.7 (1.35) c | 69.2 (3.73) | 160 (2.91) a |
| *Phragmites australis* | 12.8 (2.25) c | 24.2 (1.83) c | 72.5 (4.25) | 251 (6.73) c |
| *Typha* x *glauca* | 17.7 (1.96) c | 36.0 (1.87) b | 71.4 (3.30) | 220 (5.03) b |

**Figure S1.Aerial view of the Miller Woods study area, based on HI-Res 2008 Orthophotos.** White ponds are those sampled via transects in 1982 and 2010/2011. Black ponds with white outlines are those sampled via quadrats in different patch types. Lined ponds are those sampled for the transect-level resurvey and the quadrat-level patch analysis. Pond age increases from NNE to SSW.


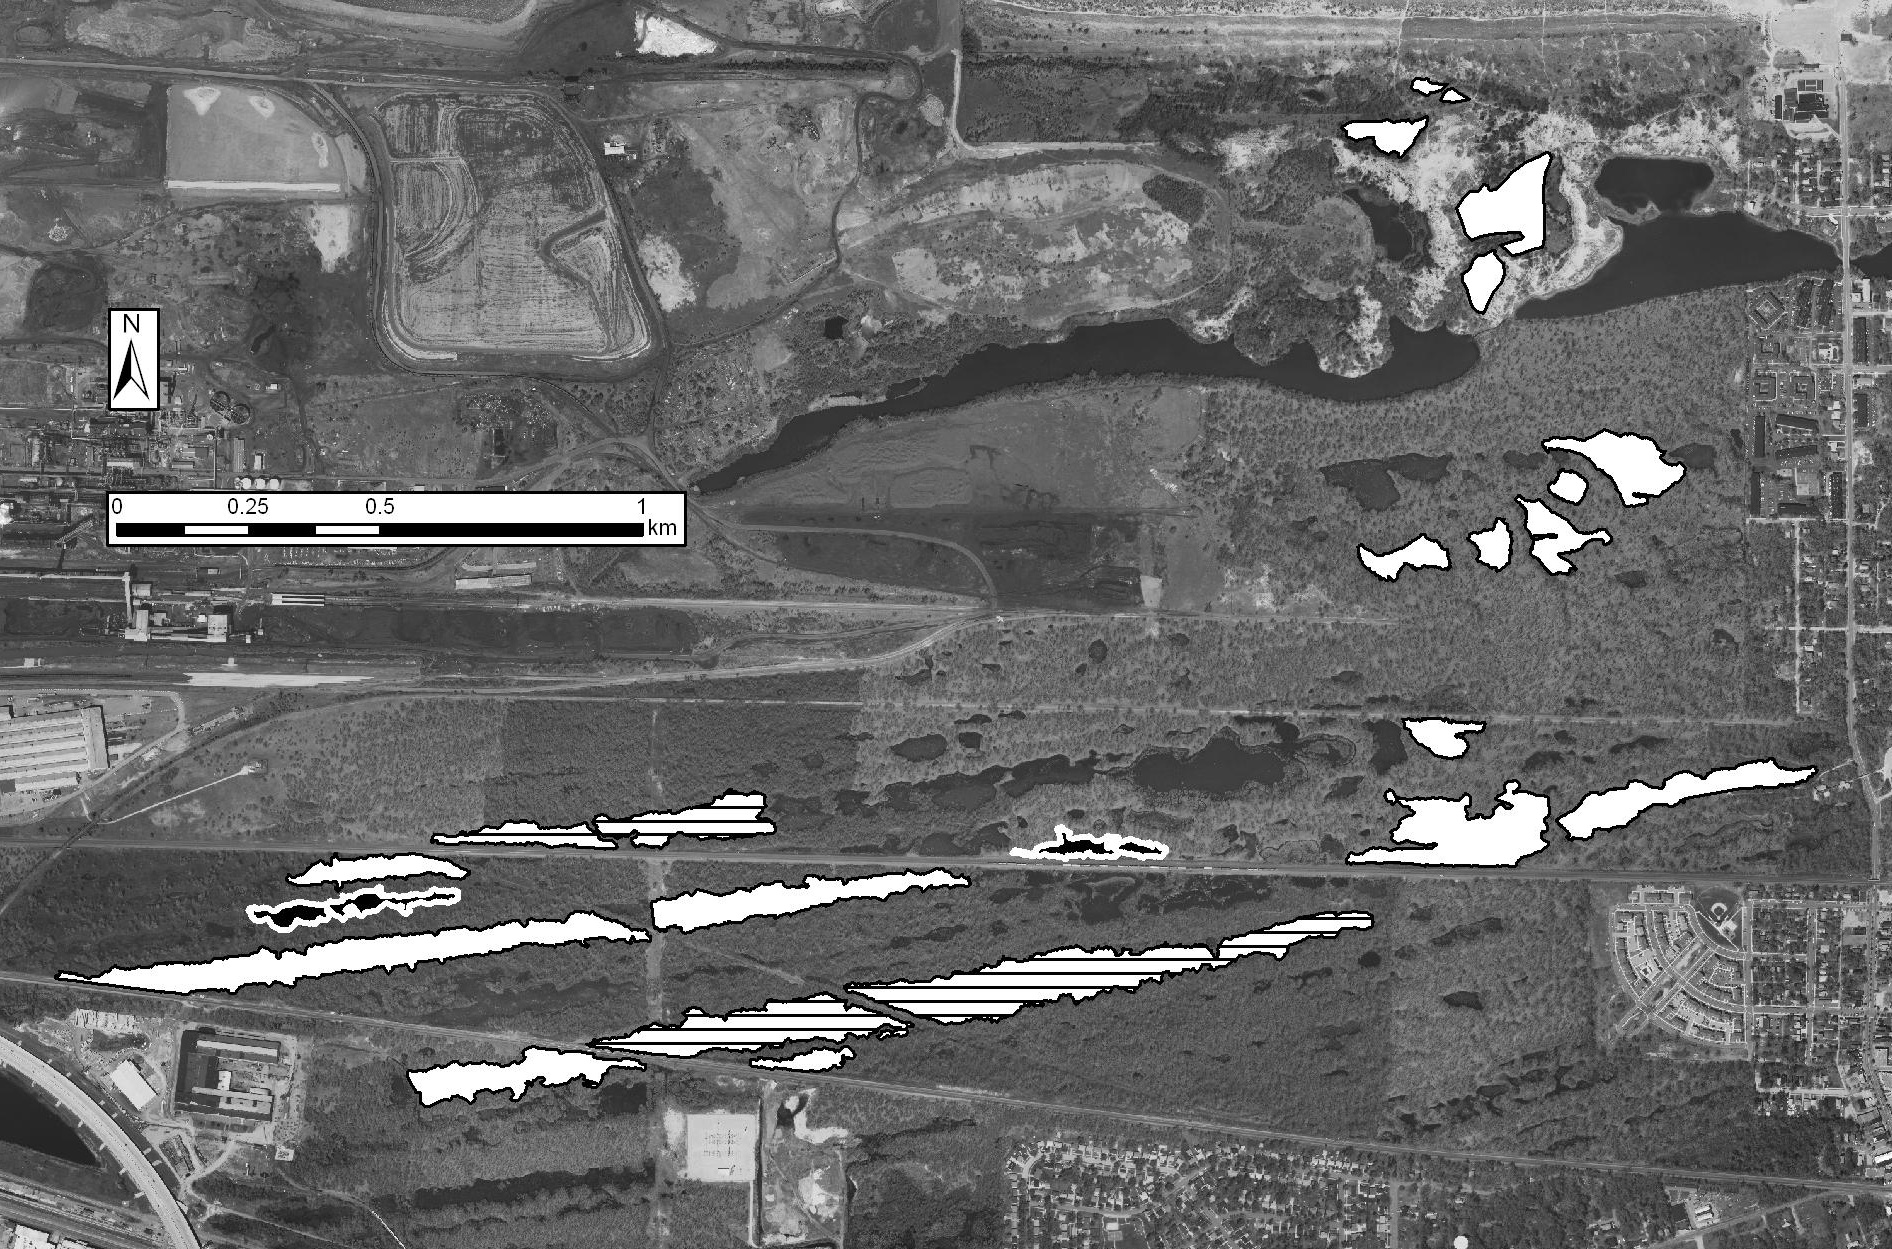


**Figure S2. Relationship between the 2010/2011 combined cover of all invaders (*Cephalanthus occidentalis, Typha* x *glauca*, *Lythrum salicara*, *Persicaria hydropiperoides*, and *Phragmites australis*) and the amount of pond shoreline altered by roads or railroads.** Both variables are arcsin(sqrt)-transformed. Black circles are young ponds, gray squares are old ponds. Young pond and all pond regressions are significant (p < 0.05); the relationship in just old ponds is significant at p<0.10 level.


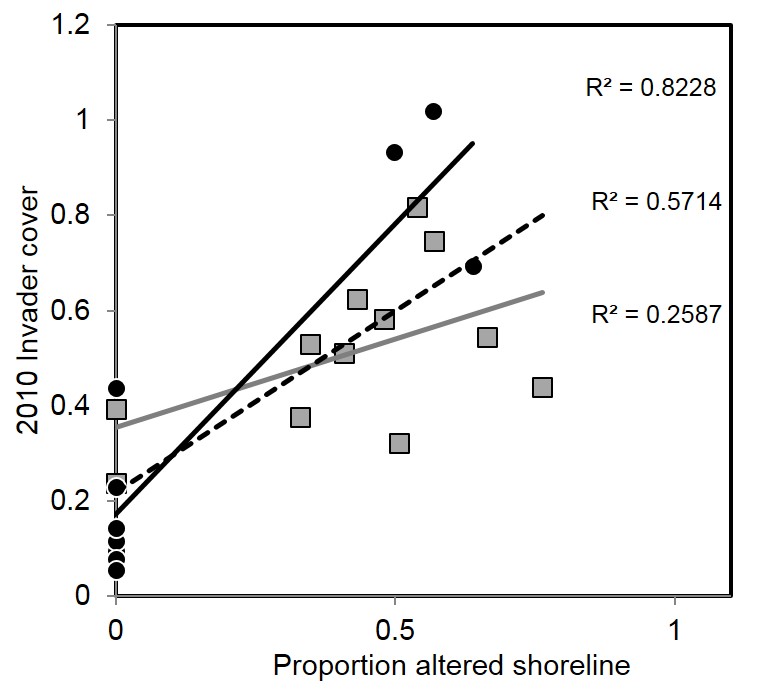


**Figure S3. 0.5 m2 quadrat-level evenness of taxa in areas dominated by *Cephalanthus occidentalis* (native)*, Schoenoplectus acutus* (native)*, Phragmites australis* (exotic), *Typha* x *glauca* (native-exotic hybrid) or reference areas.** Mixed-model ANOVA is significant at p< 0.05.


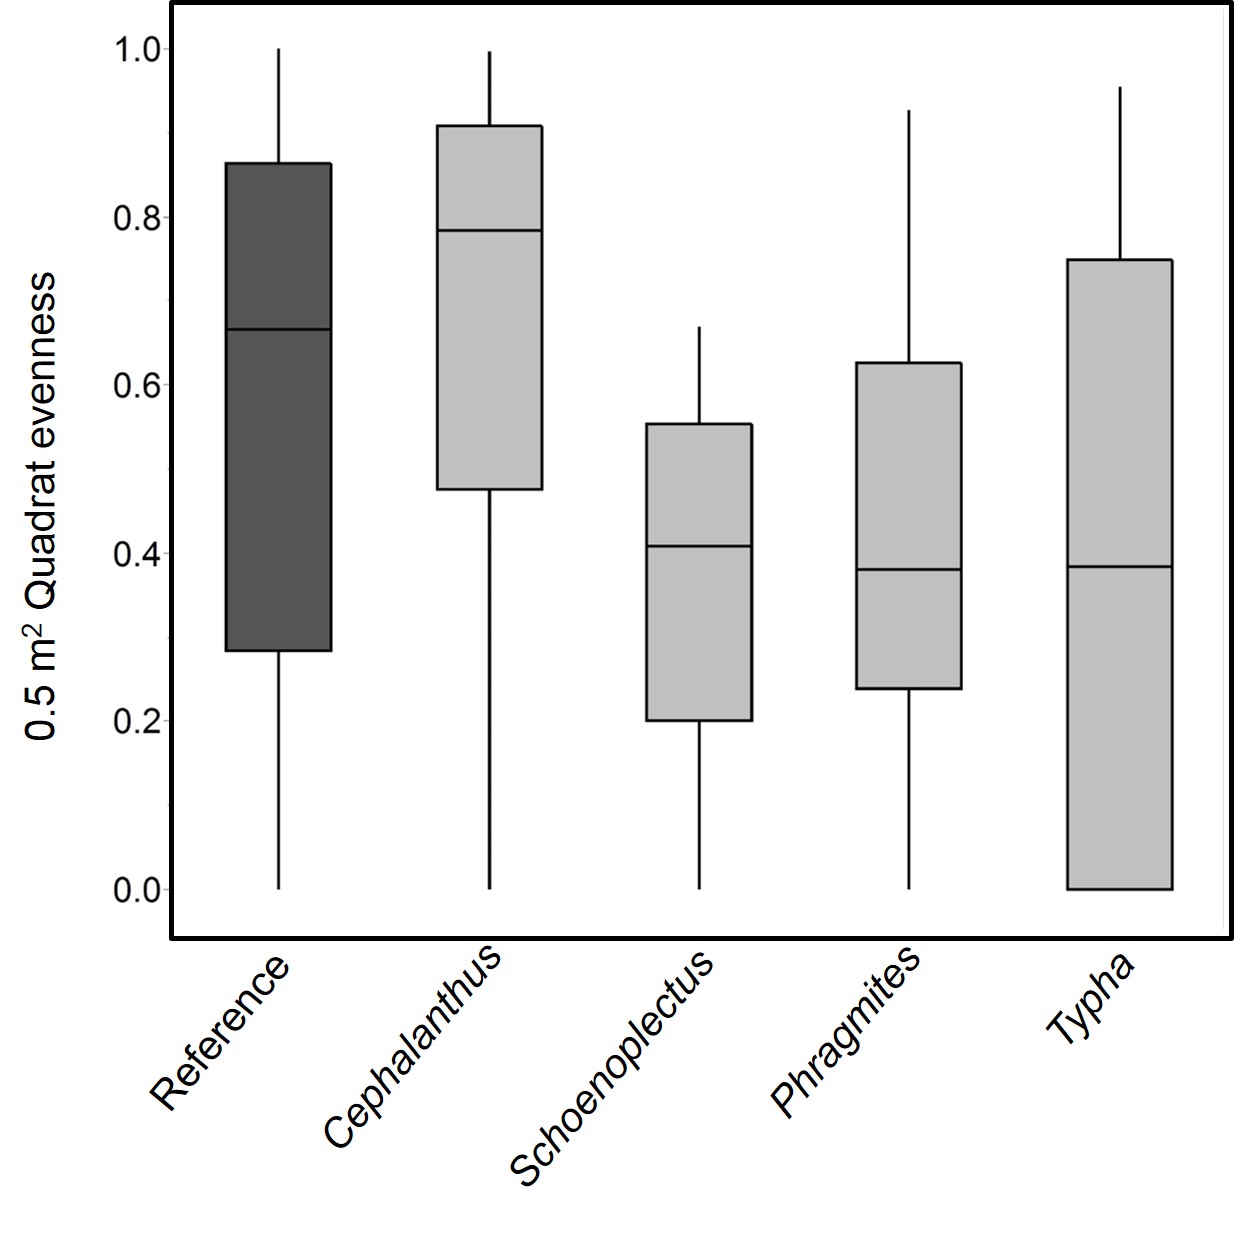

Supplement: Supplementary file 1
